# Supplementary material
Source: PubMed Central journal article supplement (PMC4223503)

## Supplementary Table S1

Spectral multiplicity in HeLa triplicate experiment.

| <i>Multiplicity</i> | <i>No. of Spectra</i> | <i>Frequency</i> |
|---------------------|-----------------------|------------------|
| 1                   | 59380                 | 36.82%           |
| 2                   | 38637                 | 23.96%           |
| 3                   | 25646                 | 15.90%           |
| 4                   | 16400                 | 10.17%           |
| 5                   | 9915                  | 6.15%            |
| 6                   | 5632                  | 3.49%            |
| 7                   | 3033                  | 1.88%            |
| 8                   | 1466                  | 0.91%            |
| 9                   | 696                   | 0.43%            |
| 10                  | 280                   | 0.17%            |
| 11                  | 113                   | 0.07%            |
| 12                  | 37                    | 0.02%            |
| 13                  | 11                    | 0.01%            |
| 14                  | 7                     | 0.00%            |
| 15                  | 4                     | 0.00%            |

## Supplementary Table S2

Lists of DeMix identifications: unique peptides and protein groups (*in a separate Excel spreadsheet*)

### Supplementary Table S3

Matching fragments and ion intensities in the primary and the secondary spectra in **Fig. S4**.

| <i>Fragment</i> | <i>m/z</i> | <i>Secondary intensity</i> | <i>Primary intensity</i> |
|-----------------|------------|----------------------------|--------------------------|
| <i>y1</i>       | 147.113    | 1916274                    | 2305851                  |
| <i>b2</i>       | 157.097    | 1590674                    | 2601578                  |
| <i>y2</i>       | 204.135    | 3127053                    | 641319                   |
| <i>b3</i>       | 270.182    | 6706185                    | 7613953                  |
| <i>y3</i>       | 305.183    | 279984                     | 438165                   |
| <i>y4</i>       | 362.203    | 237962                     | 0                        |
| <i>b4</i>       | 383.266    | 946546                     | 979980                   |
| <i>y5</i>       | 459.257    | 1592772                    | 1526405                  |
| <i>y6</i>       | 556.310    | 5754106                    | 5834155                  |
| <i>y7</i>       | 613.331    | 7312736                    | 6658751                  |
| <i>y8</i>       | 776.394    | 5916213                    | 6468980                  |
| <i>y9</i>       | 889.484    | 2739208                    | 2045044                  |
| <i>y10</i>      | 1002.561   | 137281                     | 401425                   |

## Supplementary Table S4

The effect of the input type, deisotoping, software lock mass and precursor mass shift on the number of peptides identified at 1% FDR

|                                        | <i>Input type</i>            | <i>Deisotope</i> | <i>Lock-mass</i> | <i>MS1 tolerance</i> | <i>MS2 tolerance</i> | <i>Clone</i> | <i>PSM</i> | <i>Peptide</i> |
|----------------------------------------|------------------------------|------------------|------------------|----------------------|----------------------|--------------|------------|----------------|
| <i>Morpheus</i>                        | Raw                          | No               | No               | 10 ppm               | 20 ppm               | No           | 78,333     | 20,594         |
| <i>Morpheus</i>                        | Raw                          | No               | No               | 6 ppm                | 16 ppm               | No           | 90,307     | 22,065         |
| <i>Morpheus</i>                        | mzML                         | Yes              | No               | 20 ppm               | 20 ppm               | No           | 99,278     | 23,264         |
| <i>Morpheus</i>                        | mzML                         | Yes              | Yes              | 10 ppm               | 20 ppm               | No           | 106,826    | 28,303         |
| <i>Morpheus-AS</i>                     | mzML                         | Yes              | Yes              | Posterior            | Posterior            | No           | 122,208    | 33,712         |
| <i>DeMix</i><br>( <i>Morpheus-AS</i> ) | mzML                         | Yes              | Yes              | Posterior            | Posterior            | Yes          | 200,292    | 41,628         |
| <i>Morpheus</i>                        | artificial mzML<br>(+30 ppm) | Yes              | No               | 10 ppm               | 20 ppm               | No           | 767        | 428            |
| <i>Morpheus</i>                        | artificial mzML<br>(+3 Da)   | Yes              | No               | 10 ppm               | 20 ppm               | No           | 46         | 12             |
| <i>Morpheus</i>                        | artificial mzML<br>(random)  | Yes              | No               | 10 ppm               | 20 ppm               | No           | 28         | 28             |
| <i>Morpheus</i>                        | artificial mzML<br>(merge)   | Yes              | No               | 10 ppm               | 20 ppm               | No           | 603        | 311            |

# Supplementary Figure S1

Comparisons of Morpheus AS score to scores of Mascot, Andromeda and MS-GF+.

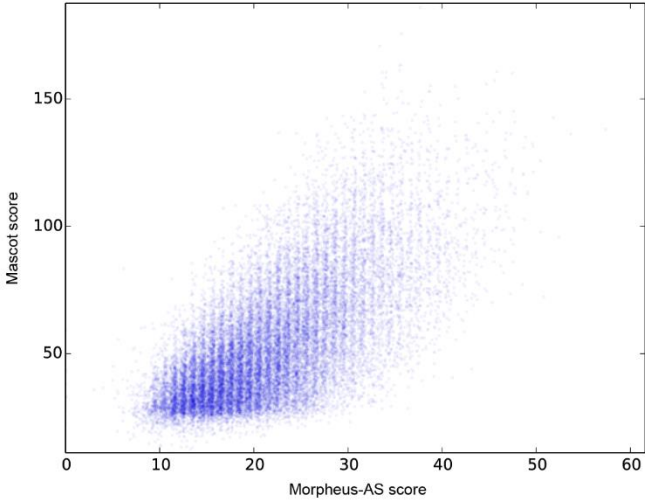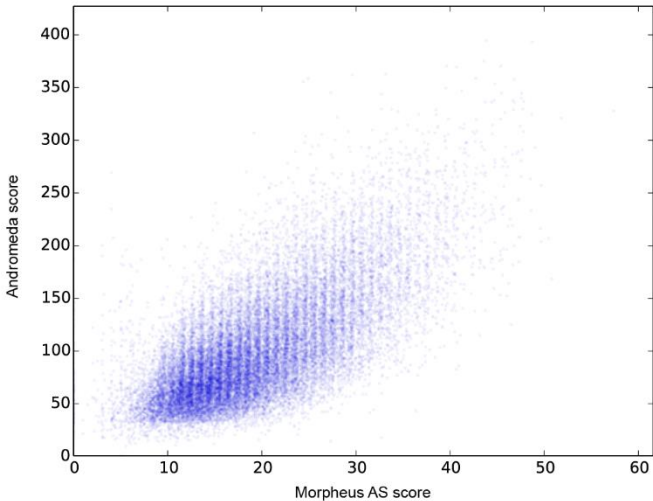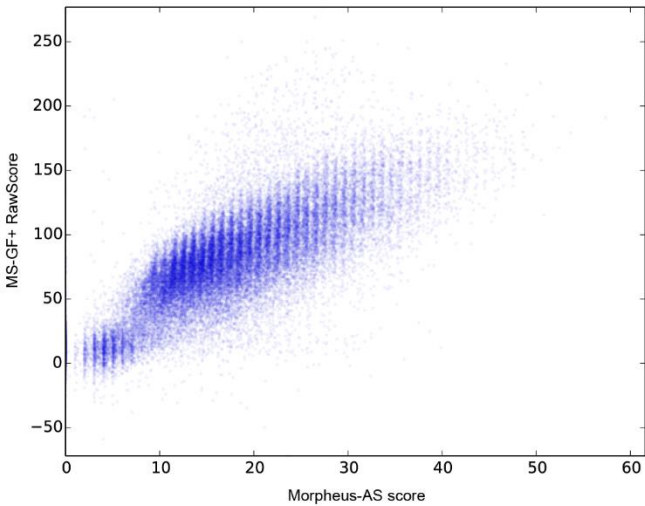

# Supplementary Figure S2

Example of four peptides annotated in a chimeric MS/MS spectrum.

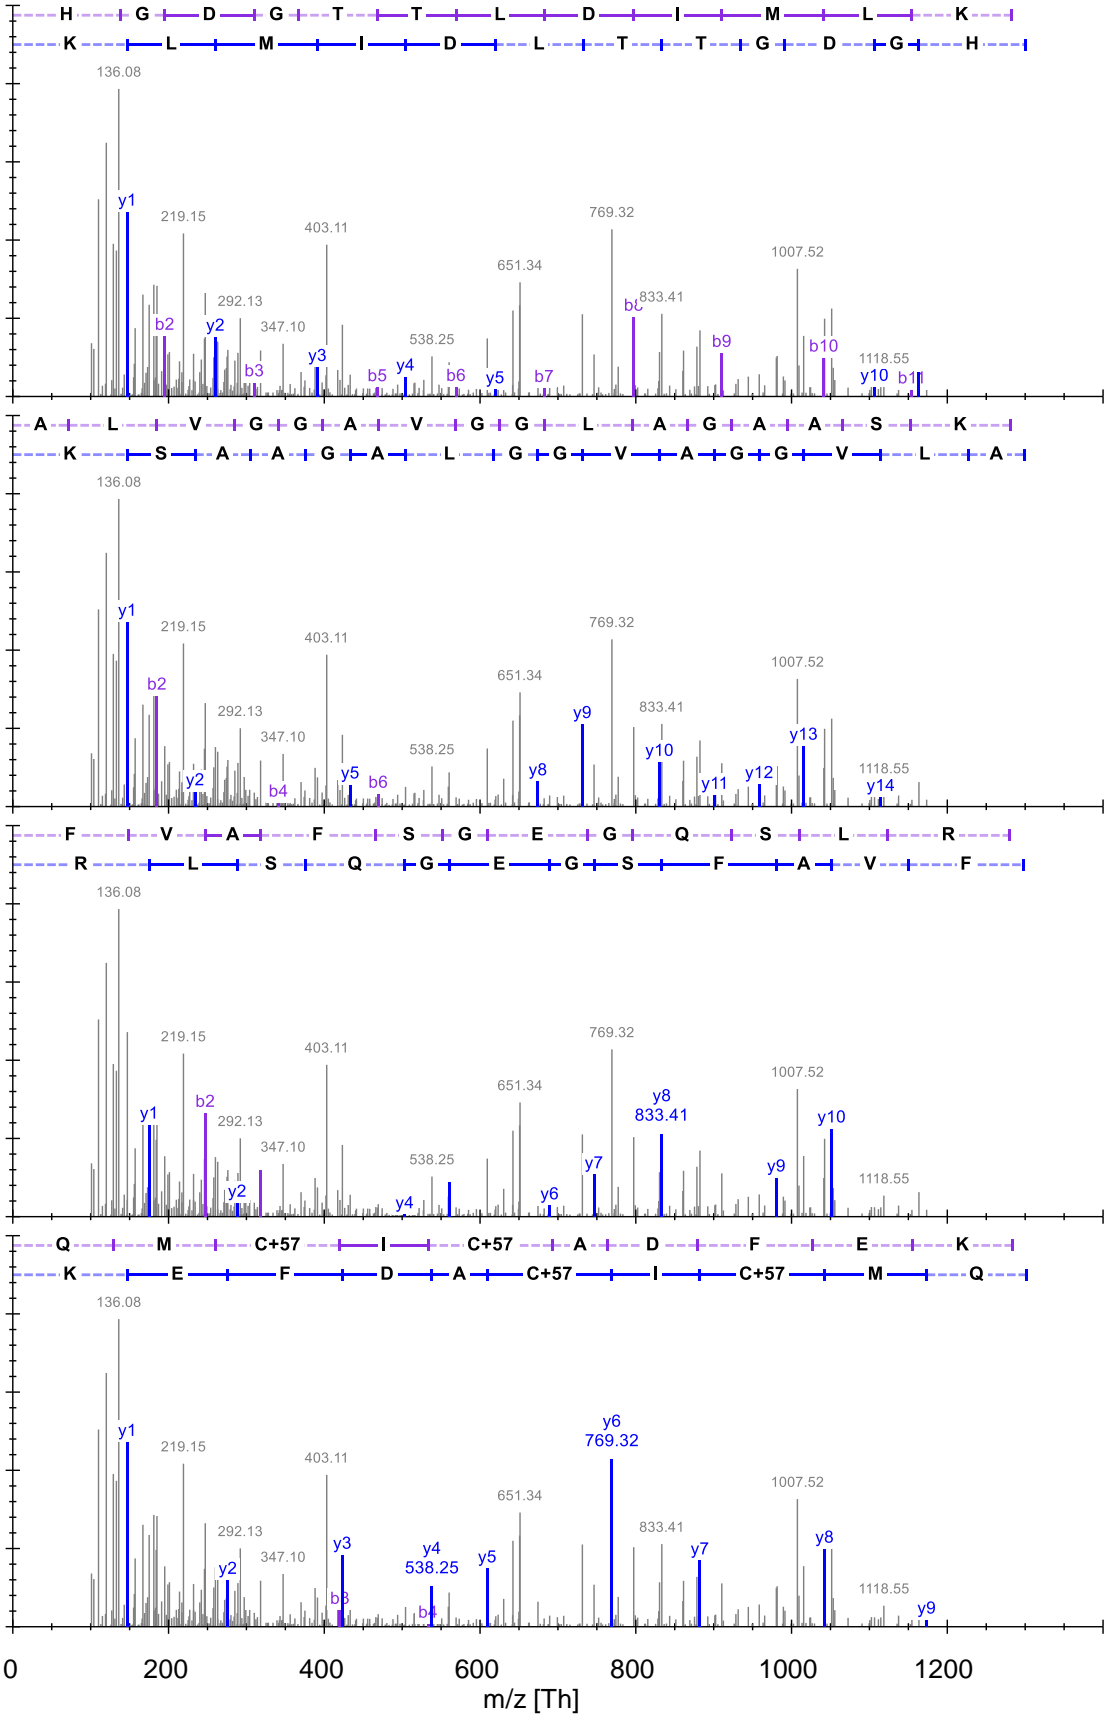

### Supplementary Figure S3

Distribution of retention time differences between peptide identifications from primary MS/MS spectra and secondary MS/MS spectra (clones). Top: in the range of 5 minutes; Bottom: in the range of 1 minute.

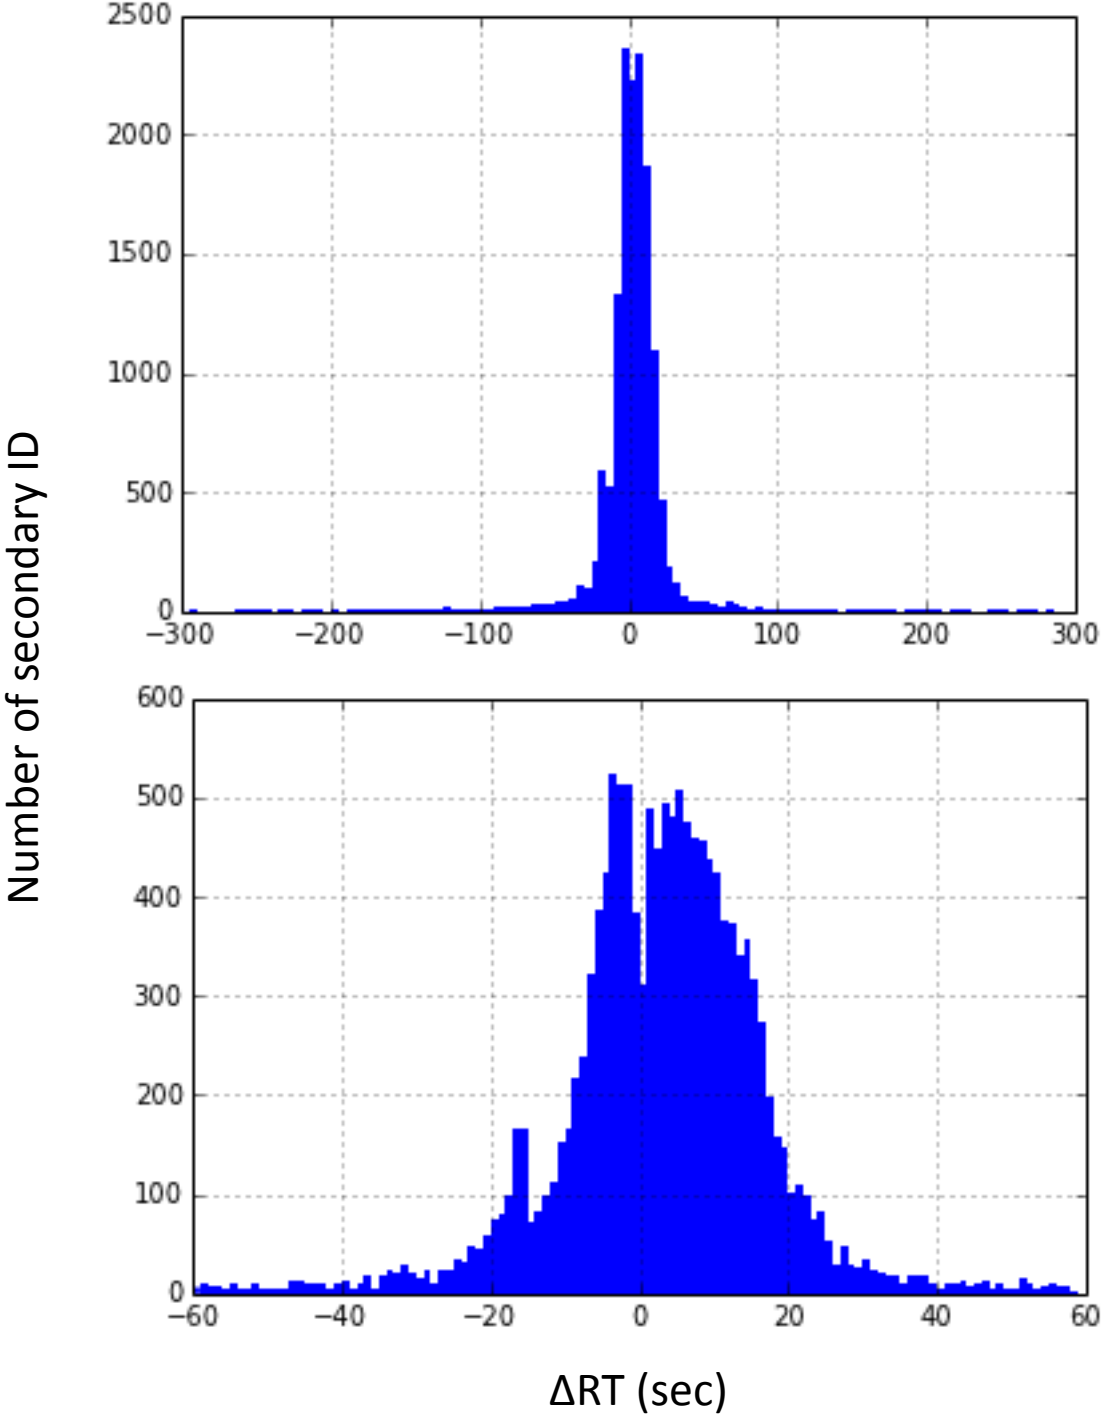

# Supplementary Figure S4

Annotation for a peptide (GVLLYGPPGTGK) identified from two distant features.

Top: secondary (clone) spectrum, retention time 88 min. Bottom: primary spectrum, retention time 92.5 min;

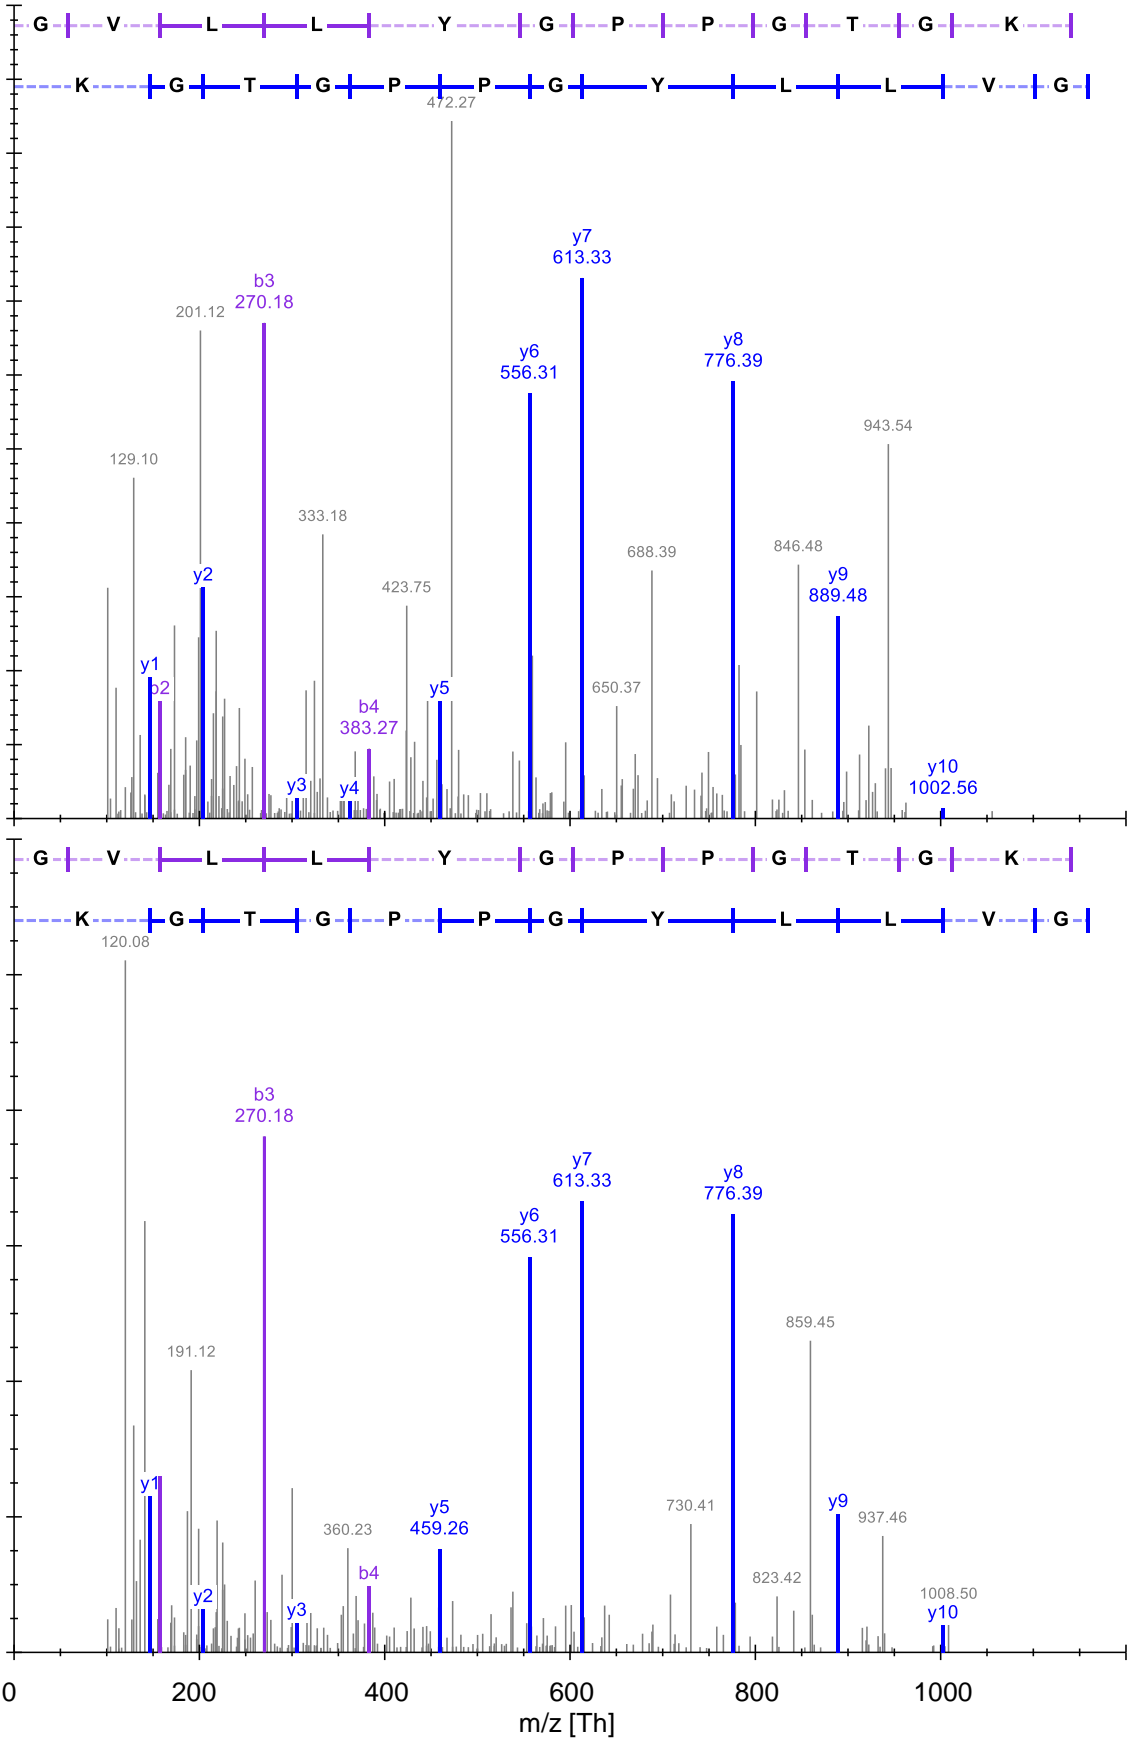

### Supplementary Figure S5

Intensities correlation from the same fragment peaks in primary and secondary spectra in **Table S3**.

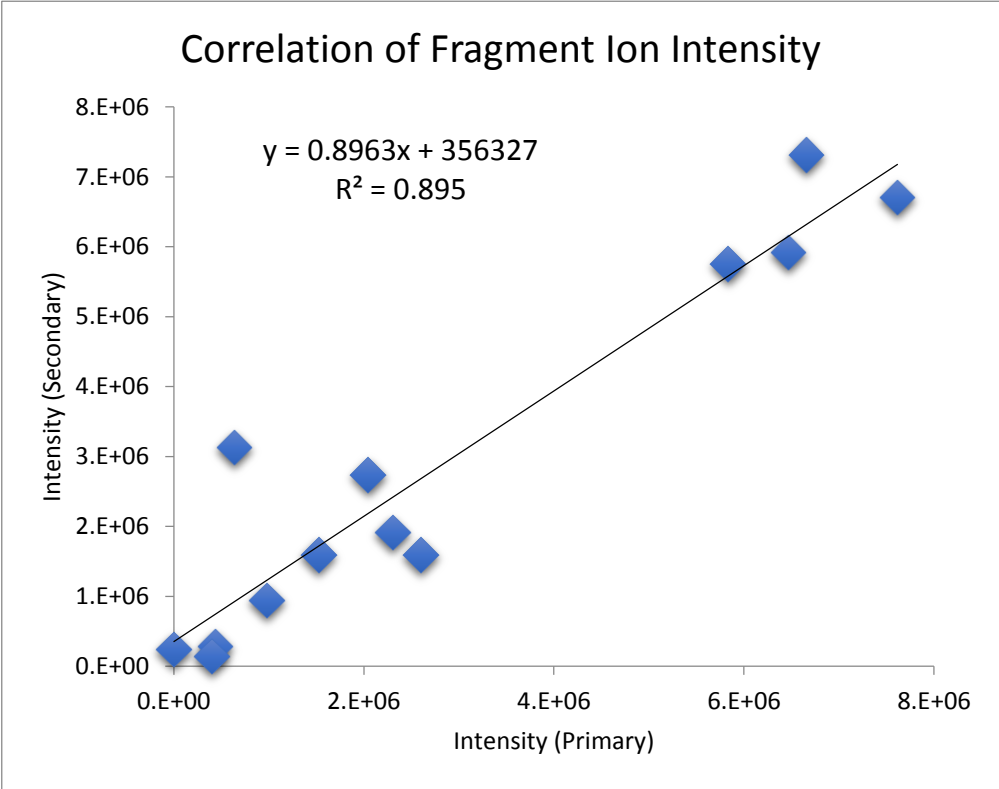

Supplement: supp_O114.038877_mcp.O114.038877-1.pdf [file supp_O114.038877_mcp.O114.038877-1.pdf]
